# Supplementary material for: Osteogenesis Imperfecta: Search for Mutations in Patients from the Republic of Bashkortostan (Russia)
Source: MDPI journal article supplement (doi:10.3390/genes13010124), 2022-01-10
Supplement: s1 [file s1]

**Supplementary Table S1.** Pathogenic mutations identified in the Bashkortostan Republic of Russia.

| Gene   | Number | dbSNP       | Coding variant | Protein effect | Mutation effect    | Reference                                                                                                                                                                                                                                           |
|--------|--------|-------------|----------------|----------------|--------------------|-----------------------------------------------------------------------------------------------------------------------------------------------------------------------------------------------------------------------------------------------------|
| COL1A1 | 1      | rs72667023  | c.579delT      | p. Gly194fs    | deletion           | Swinnen et al., 2009 [1]<br>Zhang et al., 2011 [2]<br>Fuccio et al., 2011 [3]<br>Venturi et al., 2006 [4]<br>Lindahl et al., 2015 [5]<br>Lin et al., 2015 [6]<br>Rolvien et al., 2018 [7]<br>Zhytnik et al. 2019 [8]<br>Nadyrshina et al., 2012 [9] |
|        | 2      |             | c.2444delG     | p. Gly815fs    | deletion           | Kataoka et al., 2007 [10]<br>Nadyrshina et al., 2012 [9]                                                                                                                                                                                            |
|        | 3      |             | c.375dupC      | p. Ala126fs    | duplication        | Novel                                                                                                                                                                                                                                               |
|        | 4      |             | c.407dupG      | p. Gly136fs    |                    | Novel                                                                                                                                                                                                                                               |
|        | 5      | rs762979302 | c.358C>T       | p. Arg120*     | nonsense mutations | Bardai et al., 2016 [11]                                                                                                                                                                                                                            |
|        | 6      | rs72667036  | c.658C>T       | p. Arg220*     |                    | Gentile et al., 2013 [12]<br>Lin et al., 2015 [6]<br>Zhang et al., 2015 [13]<br>Zhang et al., 2011 [2]<br>Körkkö et al., 1998 [14]<br>Lindahl et al., 2015 [5]                                                                                      |
|        | 7      |             | c.967G>T       | p. Gly323*     |                    | Nadyrshina et al., 2012 [9]                                                                                                                                                                                                                         |
|        | 8      | rs72645366  | c.1081C>T      | p. Arg361*     |                    | Körkkö et al., 1998 [14]<br>Benušienė and Kucinskas, 2003 [15]<br>Roschger et al., 2008 [16]<br>Zhang et al., 2011 [2]<br>Lindahl et al., 2015 [5]<br>van Dijk et al., 2011 [17]<br>Zhytnik et al., 2019 [8]                                        |

|    |            |              |              |                     |                                                                                                                                                                                                                                                                  |
|----|------------|--------------|--------------|---------------------|------------------------------------------------------------------------------------------------------------------------------------------------------------------------------------------------------------------------------------------------------------------|
|    |            |              |              |                     | Nadyrshina et al., 2012 [9]                                                                                                                                                                                                                                      |
| 9  | rs72648326 | c.1243C>T    | p. Arg415*   |                     | Willing et al., 1996 [18]<br>Ries-Levavi et al., 2004 [19]<br>Reis et al., 2005 [20]<br>Lindahl et al., 2015 [5]<br>Hruskova et al., 2016 [21]                                                                                                                   |
| 10 | rs72653161 | c.2869C>T    | p. Gln957*   |                     | Ries-Levavi et al., 2004 [19]<br>Nadyrshina et al., 2012 [9]                                                                                                                                                                                                     |
| 11 | rs72653173 | c.3076C>T    | p. Arg1026*  |                     | Ries et al., 2000 [22]<br>Ries-Levavi et al., 2004 [19]<br>Hartikka et al., 2004 [23]<br>Gentile et al., 2013 [12]<br>Zhang et al., 2011 [2]<br>Niramitmahapanya et al., 2013 [24]<br>Lin et al., 2015 [6]<br>Kaneto et al., 2014 [25]<br>Duan et al., 2016 [26] |
| 12 |            | c.3792delG   | p. Met1264fs | Frameshift mutation | Novel                                                                                                                                                                                                                                                            |
| 13 | rs67569268 | c.858+1G>A   | -            |                     | Körkkö et al., 1998 [14]                                                                                                                                                                                                                                         |
| 14 | rs72648337 | c.1354-12G>A | -            |                     | Körkkö et al., 1998 [14]<br>Marini et al., 2007 [27]<br>Lindahl et al., 2015 [5]<br>Lin et al., 2015 [6]                                                                                                                                                         |
| 15 | rs67693970 | c.2461G>A    | p. Gly821Ser | missense mutation   | Marini et al., 2007 [27]<br>Lund et al., 1997 [28]<br>Wang et al., 2006 [29]<br>Venturi et al., 2006 [4]<br>Lee et al., 2006 [30]<br>Zhang et al., 2011 [2]<br>Fuccio et al., 2011 [3]<br>Lin et al., 2015 [6]<br>Lindahl et al., 2015 [5]                       |

|               |    |              |                      |                     |                   |                                                                                                                                                                                                                                                                                                 |
|---------------|----|--------------|----------------------|---------------------|-------------------|-------------------------------------------------------------------------------------------------------------------------------------------------------------------------------------------------------------------------------------------------------------------------------------------------|
| <i>COL1A2</i> | 16 | rs72653141   | c.2569G>T            | p. Gly857Cys        |                   | Kloen et al., 2018 [31]<br>Mohd Nawawi et al., 2018 [32]<br>Ho Duy et al., 2016 [33]<br>Marini et al., 2007 [27]<br>Wang et al., 2015 [34]                                                                                                                                                      |
|               | 1  | rs756743425  | c.647G>A             | p. Arg216His        | missense mutation | Novel                                                                                                                                                                                                                                                                                           |
|               | 2  | rs906553840  | c. 874G>A            | p. Gly292Ser        |                   | Lindahl et al., 2015 [5]<br>Ho Duy et al., 2016 [33]<br>Rolvien et al., 2018 [7]                                                                                                                                                                                                                |
|               | 3  | rs758673298  | c.1826G>A            | p. Arg609Gln        |                   | Novel                                                                                                                                                                                                                                                                                           |
|               | 4  | rs68132885   | c.1197+5G>A          | -                   |                   | Lindahl et al., 2015 [5]<br>Marini et al., 2007 [27]<br>Nicholls et al., 1996 [35]                                                                                                                                                                                                              |
|               | 5  |              | c.2341G>C            | p. Gly781Arg        |                   | Novel                                                                                                                                                                                                                                                                                           |
|               | 6  | rs1554398261 | c.2756G>A            | p. Gly919Asp        |                   | Barkova et al., 2014 [36]                                                                                                                                                                                                                                                                       |
|               | 7  |              | c.2971G>C            | p. Gly991Arg        |                   | Novel                                                                                                                                                                                                                                                                                           |
|               | 8  | rs72659319   | c.3034G>A            | p. Gly1012Ser       |                   | Marini et al., 2007 [27]<br>Marini et al., 1993 [37]<br>Sztrolovics et al., 1993 [38]<br>Forlino et al., 1997 [39]<br>Hartikka et al., 2004 [23]<br>Lee et al., 2006 [30]<br>Lindahl et al., 2015 [5]<br>Ho Duy et al., 2016 [33]<br>Stephen et al., 2015 [40]<br>Mohd Nawawi et al., 2018 [32] |
|               | 9  |              | c.3277G>A            | p. Gly1093Ser       |                   | Novel                                                                                                                                                                                                                                                                                           |
|               | 10 |              | c.3977A>G            | p. Lys1326Arg       |                   | Novel                                                                                                                                                                                                                                                                                           |
|               | 11 |              | c.1897_1902dupGCTGGT | p. Ala633_Gly634dup | duplication       | Novel                                                                                                                                                                                                                                                                                           |
| <i>P3H1</i>   | 1  |              | c.1051G>T            | p. Glu351*          | nonsense mutation | Novel                                                                                                                                                                                                                                                                                           |

|               |   |             |          |   |                         |                                                                                                                                                           |
|---------------|---|-------------|----------|---|-------------------------|-----------------------------------------------------------------------------------------------------------------------------------------------------------|
|               |   |             |          |   |                         | Semler et al., 2012<br>[41]                                                                                                                               |
|               |   |             |          |   |                         | Balasubramanian et<br>al., 2013 [42]                                                                                                                      |
|               |   |             |          |   |                         | Cho et al., 2012 [43]                                                                                                                                     |
|               |   |             |          |   |                         | Grover et al., 2013<br>[44]                                                                                                                               |
|               |   |             |          |   |                         | Takagi et al., 2013<br>[45]                                                                                                                               |
| <i>IFITM5</i> | 1 | rs587776916 | c.-14C>T | - | start codon<br>mutation | Kim et al., 2013 [46]<br>Zhang et al., 2013<br>[47]<br>Guillén-Navarro et<br>al., 2014 [48]<br>Rauch et al., 2014<br>[49]<br>Lazarus et al., 2014<br>[50] |

## References

- Swinnen, F.K.; De Leenheer, E.M.; Coucke, P.J.; Cremers, C.W.; Dhooge, I.J. Audiometric, surgical, and genetic findings in 15 ears of patients with osteogenesis imperfecta. *Laryngoscope* **2009**, *119*, 1171–1179. <https://doi.org/10.1002/lary.20155>.
- Zhang, Z.-L.; Zhang, H.; Ke, Y.-H.; Yue, H.; Xiao, W.-J.; Yu, J.-B.; Gu, J.-M.; Hu, W.-W.; Wang, C.; He, J.-W.; et al. The identification of novel mutations in COL1A1, COL1A2, and LEPRE1 genes in Chinese patients with osteogenesis imperfecta. *J. Bone Miner. Metab.* **2012**, *30*, 69–77. <https://doi.org/10.1007/s00774-011-0284-6>.
- Fuccio, A.; Iorio, M.; Amato, F.; Elce, A.; Ingino, R.; Filocamo, M.; Castaldo, G.; Salvatore, F.; Tomaiuolo, R. A Novel DHPLC-Based Procedure for the Analysis of COL1A1 and COL1A2 Mutations in Osteogenesis Imperfecta. *J. Mol. Diagn.* **2011**, *13*, 648–656. <https://doi.org/10.1016/j.jmoldx.2011.06.006>.
- Venturi, G.; Tedeschi, E.; Mottes, M.; Valli, M.; Camilot, M.; Viglio, S.; Antoniazzi, F.; Tatò, L. Osteogenesis imperfecta: Clinical, biochemical and molecular findings. *Clin. Genet.* **2006**, *70*, 131–139. <https://doi.org/10.1111/j.1399-0004.2006.00646.x>.
- Lindahl, K.; Åström, E.; Rubin, C.-J.; Grigelioniene, G.; Malmgren, B.; Ljunggren, Ö.; Kindmark, A. Genetic epidemiology, prevalence, and genotype–phenotype correlations in the Swedish population with osteogenesis imperfecta. *Eur. J. Hum. Genet.* **2015**, *23*, 1042–1050. <https://doi.org/10.1038/ejhg.2015.81>.
- Lin, H.-Y.; Chuang, C.-K.; Su, Y.-N.; Chen, M.-R.; Chiu, H.-C.; Niu, D.-M.; Lin, S.-P. Genotype and phenotype analysis of Taiwanese patients with osteogenesis imperfecta. *Orphanet J. Rare Dis.* **2015**, *10*, 152. <https://doi.org/10.1186/s13023-015-0370-2>.
- Rolvien, T.; Stürznickel, J.; Schmidt, F.N.; Butscheidt, S.; Schmidt, T.; Busse, B.; Mundlos, S.; Schinke, T.; Kornak, U.; Amling, M.; et al. Comparison of Bone Microarchitecture Between Adult Osteogenesis Imperfecta and Early-Onset Osteoporosis. *Calcif. Tissue Int.* **2018**, *103*, 512–521. <https://doi.org/10.1007/s00223-018-0447-8>.
- Zhytnik, L.; Maasalu, K.; Pashenko, A.; Khmyzov, S.; Reimann, E.; Prans, E.; Kõks, S.; Märtson, A. COL1A1/2 Pathogenic Variants and Phenotype Characteristics in Ukrainian Osteogenesis Imperfecta Patients. *Front. Genet.* **2019**, *10*, 722. <https://doi.org/10.3389/fgene.2019.00722>.
- Nadyrshina, D.D.; Khusainova, R.I.; Khusnutdinova, E.K. Studies of type I collagen (COL1A1) alpha1 chain in patients with osteogenesis imperfecta. *Genetika* **2012**, *48*, 372–380. Russian. PMID: 22679784.
- Kataoka, K.; Ogura, E.; Hasegawa, K.; Inoue, M.; Seino, Y.; Morishima, T.; Tanaka, H. Mutations in type I collagen genes in Japanese osteogenesis imperfecta patients. *Pediatr. Int.* **2007**, *49*, 564–569. <https://doi.org/10.1111/j.1442-200x.2007.02422.x>.
- Bardai, G.; Moffatt, P.; Glorieux, F.H.; Rauch, F. DNA sequence analysis in 598 individuals with a clinical diagnosis of osteogenesis imperfecta: Diagnostic yield and mutation spectrum. *Osteoporos. Int.* **2016**, *27*, 3607–3613. <https://doi.org/10.1007/s00198-016-3709-1>.
- Gentile, F.V.; Zuntini, M.; Parra, A.; Battistelli, L.; Pandolfi, M.; Pals, G.; Sangiorgi, L. Validation of a quantitative PCR-high-resolution melting protocol for simultaneous screening of COL1A1 and COL1A2 point mutations and large rearrangements: Application for diagnosis of osteogenesis imperfecta. *Hum. Mutat.* **2012**, *33*, 1697–1707. <https://doi.org/10.1002/humu.22146>.

13. Zhang, H.; Yang, R.; Wang, Y.; Ye, J.; Han, L.; Qiu, W.; Gu, X. A pilot study of gene testing of genetic bone dysplasia using targeted next-generation sequencing. *J. Hum. Genet.* **2015**, *60*, 769–776. <https://doi.org/10.1038/jhg.2015.112>.
14. Körkkö, J.; Ala-Kokko, L.; De Paepe, A.; Nuytinck, L.; Earley, J.; Prockop, D.J. Analysis of the COL1A1 and COL1A2 Genes by PCR Amplification and Scanning by Conformation-Sensitive Gel Electrophoresis Identifies Only COL1A1 Mutations in 15 Patients with Osteogenesis Imperfecta Type I: Identification of Common Sequences of Null-Allele Mutations. *Am. J. Hum. Genet.* **1998**, *62*, 98–110. <https://doi.org/10.1086/301689>.
15. Benusienė, E.; Kucinskas, V. COL1A1 mutation analysis in Lithuanian patients with osteogenesis imperfecta. *J. Appl. Genet.* **2003**, *44*, 95–102.
16. Roschger, P.; Fratzl-Zelman, N.; Misof, B.M.; Glorieux, F.H.; Klaushofer, K.; Rauch, F. Evidence that Abnormal High Bone Mineralization in Growing Children with Osteogenesis Imperfecta is not Associated with Specific Collagen Mutations. *Calcif. Tissue Int.* **2008**, *82*, 263–270. <https://doi.org/10.1007/s00223-008-9113-x>.
17. Van Dijk, F.; Cobben, J.; Kariminejad, A.; Maugeri, A.; Nikkels, P.; van Rijn, R.; Pals, G. Osteogenesis Imperfecta: A Review with Clinical Examples. *Mol. Syndr.* **2011**, *2*, 1–20. <https://doi.org/10.1159/000332228>.
18. Willing, M.C.; Deschenes, S.P.; Slayton, R.L.; Roberts, E.J. Premature chain termination is a unifying mechanism for COL1A1 null alleles in osteogenesis imperfecta type I cell strains. *Am. J. Hum. Genet.* **1996**, *59*, 799–809.
19. Ries-Levavi, L.; Ish-Shalom, T.; Frydman, M.; Lev, D.; Cohen, S.; Barkai, G.; Goldman, B.; Byers, P.; Friedman, E. Genetic and biochemical analyses of Israeli osteogenesis imperfecta patients. *Hum. Mutat.* **2004**, *23*, 399–400. <https://doi.org/10.1002/humu.9230>.
20. Reis, F.C.; Alexandrino, F.; E Steiner, C.; Norato, D.Y.J.; Cavalcanti, D.P.; Sartorato, E.L. Molecular findings in Brazilian patients with osteogenesis imperfecta. *J. Appl. Genet.* **2005**, *46*, 105–108.
21. Hruskova, L.; Fijalkowski, I.; Van Hul, W.; Marik, I.; Mortier, G.; Martasek, P.; Mazura, I. Eight mutations including 5 novel ones in the COL1A1 gene in Czech patients with osteogenesis imperfecta. *Biomed. Pap.* **2016**, *160*, 442–447. <https://doi.org/10.5507/bp.2016.022>.
22. Ries, L.; Frydman, M.; Barkai, G.; Goldman, B.; Friedman, E. Prenatal diagnosis of a novel COL1A1 mutation in osteogenesis imperfecta type I carried through full term pregnancy. *Prenat. Diagn.* **2000**, *20*, 876–880. [https://doi.org/10.1002/1097-0223\(200011\)20:113.0.co;2-x](https://doi.org/10.1002/1097-0223(200011)20:113.0.co;2-x).
23. Hartikka, H.; Kuurila, K.; Körkkö, J.; Kaitila, I.; Grénman, R.; Pynnönen, S.; Hyland, J.C.; Ala-Kokko, L. Lack of correlation between the type of COL1A1 or COL1A2 mutation and hearing loss in osteogenesis imperfecta patients. *Hum. Mutat.* **2004**, *24*, 147–154. <https://doi.org/10.1002/humu.20071>.
24. Niramitmahapanya, S.; Anusornvongchai, T.; Pingsuthiwong, S.; Sarinnapakorn, V.; Deerochanawong, C.; Sunthornthepvarakul, T. Novel COL1A1 gene mutation (R1026X) of type I osteogenesis imperfecta: A first case report. *J. Med. Assoc. Thail. = Chotmaihet thangphaet* **2013**, *96*, 23682531.
25. Kaneto, C.M.; Lima, P.S.; Zanette, D.L.; Prata, K.L.; Neto, J.M.P.; de Paula, F.J.; A Silva, W. COL1A1 and miR-29b show lower expression levels during osteoblast differentiation of bone marrow stromal cells from Osteogenesis Imperfecta patients. *BMC Med Genet.* **2014**, *15*, 45. <https://doi.org/10.1186/1471-2350-15-45>.
26. Duan, H.; Yan, Z.; Lu, Y.; Cheng, J.; Zhang, D.; Yuan, H.; Han, D. Identification of two recurrent mutations of COL1A1 gene in Chinese Van der Hoeve syndrome patients. *Acta Oto-Laryngol.* **2016**, *136*, 786–791. <https://doi.org/10.3109/00016489.2016.1159327>.
27. Marini, J.C.; Forlino, A.; Cabral, W.A.; Barnes, A.; Antonio, J.D.S.; Milgrom, S.; Hyland, J.C.; Körkkö, J.; Prockop, D.J.; De Paepe, A.; et al. Consortium for osteogenesis imperfecta mutations in the helical domain of type I collagen: Regions rich in lethal mutations align with collagen binding sites for integrins and proteoglycans. *Hum. Mutat.* **2007**, *28*, 209–221. <https://doi.org/10.1002/humu.20429>.
28. Lund, A.M.; Skovby, F.; Schwartz, M. Serine for glycine substitutions in the C-terminal third of the alpha 1(I) chain of collagen I in five patients with nonlethal osteogenesis imperfecta. *Hum Mutat.* **1997**, *9*, 378–382. [https://doi.org/10.1002/\(SICI\)1098-1004\(1997\)9:43.0.CO;2-#](https://doi.org/10.1002/(SICI)1098-1004(1997)9:43.0.CO;2-#). PMID: 9101304.
29. Wang, Z.; Xu, D.-L.; Hu, J.-Y.; Liao, Y.-H.; Yang, Z.; Liang, Q.; Wang, L.-T. Gene mutation analysis of a Chinese family with osteogenesis imperfecta. *Zhonghua Yi Xue Yi Chuan Xue Za Zhi* **2006**, *23*, 192–194.
30. Lee, K.-S.; Song, H.-R.; Cho, T.-J.; Kim, H.J.; Lee, T.-M.; Jin, H.-S.; Park, H.-Y.; Kang, S.; Jung, S.-C.; Koo, S.K. Mutational spectrum of type I collagen genes in Korean patients with osteogenesis imperfecta. *Hum. Mutat.* **2006**, *27*, 599. <https://doi.org/10.1002/humu.9423>.
31. Kloen, P.; Donders, J.C.; Eekhoff, E.M.W.; Hamdy, R.C. Pauwels Osteotomy for Femoral Neck Nonunion in Two Adult Siblings with Osteogenesis Imperfecta. *Hip Pelvis* **2018**, *30*, 53–59. <https://doi.org/10.5371/hp.2018.30.1.53>.
32. Nawawi, N.M.; Selveindran, N.M.; Rasat, R.; Chow, Y.P.; Latiff, Z.A.; Zakaria, S.Z.S.; Jamal, R.; Murad, N.A.A.; Aziz, B.B.A. Genotype-phenotype correlation among Malaysian patients with osteogenesis imperfecta. *Clin. Chim. Acta* **2018**, *484*, 141–147. <https://doi.org/10.1016/j.cca.2018.05.048>.

33. Duy, B.H.; Zhytnik, L.; Maasalu, K.; Kändla, I.; Prans, E.; Reimann, E.; Märtson, A.; Kõks, S. Mutation analysis of the COL1A1 and COL1A2 genes in Vietnamese patients with osteogenesis imperfecta. *Hum. Genom.* **2016**, *10*, 27. <https://doi.org/10.1186/s40246-016-0083-1>.
34. Wang, Y.; Cui, Y.; Zhou, X.; Han, J. Development of a High-Throughput Resequencing Array for the Detection of Pathogenic Mutations in Osteogenesis Imperfecta. *PLoS ONE* **2015**, *10*, e0119553. <https://doi.org/10.1371/journal.pone.0119553>.
35. Nicholls, A.C.; Oliver, J.; McCarron, S.; Winter, G.B.; Pope, F.M. Splice site mutation causing deletion of exon 21 sequences from the pro alpha 2(I) chain of type I collagen in a patient with severe dentinogenesis imperfecta but very mild osteogenesis imperfecta. *Hum. Mutat.* **1996**, *7*, 219–227. [https://doi.org/10.1002/\(SICI\)1098-1004\(1996\)7:33.0.CO;2-5](https://doi.org/10.1002/(SICI)1098-1004(1996)7:33.0.CO;2-5). PMID: 8829655.
36. Barkova, E.; Mohan, U.; Chitayat, D.; Keating, S.; Toi, A.; Frank, J.; Frank, R.; Tomlinson, G.; Glanc, P. Fetal skeletal dysplasias in a tertiary care center: Radiology, pathology, and molecular analysis of 112 cases. *Clin. Genet.* **2014**, *87*, 330–337. <https://doi.org/10.1111/cge.12434>.
37. Marini, J.C.; Lewis, M.B.; Wang, Q.; Chen, K.J.; Orrison, B.M. Serine for glycine substitutions in type I collagen in two cases of type IV osteogenesis imperfecta (OI). Additional evidence for a regional model of OI pathophysiology. *J. Biol. Chem.* **1993**, *268*, 2667–2673.
38. Sztrolovics, R.; Glorieux, F.; Van Der Rest, M.; Roughley, P. Identification of type I collagen gene (COL1A2) mutations in nonlethal osteogenesis imperfecta. *Hum. Mol. Genet.* **1993**, *2*, 1319–1321. <https://doi.org/10.1093/hmg/2.8.1319>.
39. Forlino, A.; D'Amato, E.; Valli, M.; Camera, G.; Hopkins, E.; Marini, J.C.; Cetta, G.; Coviello, D. Phenotypic Comparison of an Osteogenesis Imperfecta Type IV Proband with a de Novo  $\alpha 2(I)$  Gly922 → Ser Substitution in Type I Collagen and an Unrelated Patient with an Identical Mutation. *Biochem. Mol. Med.* **1997**, *62*, 26–35. <https://doi.org/10.1006/bmme.1997.2620>.
40. Stephen, J.; Girisha, K.M.; Dalal, A.; Shukla, A.; Shah, H.; Srivastava, P.; Kornak, U.; Phadke, S.R. Mutations in patients with osteogenesis imperfecta from consanguineous Indian families. *Eur. J. Med. Genet.* **2015**, *58*, 21–27. <https://doi.org/10.1016/j.ejmg.2014.10.001>.
41. Semler, O.; Garbes, L.; Keupp, K.; Swan, D.; Zimmermann, K.; Becker, J.; Iden, S.; Wirth, B.; Eysel, P.; Koerber, F.; et al. A Mutation in the 5'-UTR of IFITM5 Creates an In-Frame Start Codon and Causes Autosomal-Dominant Osteogenesis Imperfecta Type V with Hyperplastic Callus. *Am. J. Hum. Genet.* **2012**, *91*, 349–357. <https://doi.org/10.1016/j.ajhg.2012.06.011>.
42. Balasubramanian, M.; Parker, M.J.; Dalton, A.; Giunta, C.; Lindert, U.; Peres, L.C.; Wagner, B.E.; Arundel, P.; Offiah, A.; Bishop, N.J. Genotype–phenotype study in type V osteogenesis imperfecta. *Clin. Dysmorphol.* **2013**, *22*, 93–101. <https://doi.org/10.1097/mcd.0b013e32836032f0>.
43. Cho, T.-J.; Lee, K.-E.; Lee, S.-K.; Song, S.J.; Kim, K.J.; Jeon, D.; Lee, G.; Kim, H.-N.; Lee, H.R.; Eom, H.-H.; et al. A Single Recurrent Mutation in the 5'-UTR of IFITM5 Causes Osteogenesis Imperfecta Type V. *Am. J. Hum. Genet.* **2012**, *91*, 343–348. <https://doi.org/10.1016/j.ajhg.2012.06.005>.
44. Grover, M.; Campeau, P.M.; Lietman, C.D.; Lu, J.T.; Gibbs, R.A.; Schlesinger, A.E.; Lee, B.H. Osteogenesis imperfecta without features of type V caused by a mutation in the IFITM5 gene. *J. Bone Miner. Res.* **2013**, *28*, 2333–2337. <https://doi.org/10.1002/jbmr.1983>.
45. Takagi, M.; Sato, S.; Hara, K.; Tani, C.; Miyazaki, O.; Nishimura, G.; Hasegawa, T. A recurrent mutation in the 5'-UTR of IFITM5 causes osteogenesis imperfecta type V. *Am. J. Med. Genet. Part A* **2013**, *161*, 1980–1982. <https://doi.org/10.1002/ajmg.a.36025>.
46. Kim, O.-H.; Jin, D.-K.; Kosaki, K.; Kim, J.-W.; Cho, S.Y.; Yoo, W.J.; Choi, I.H.; Nishimura, G.; Ikegawa, S.; Cho, T.-J. Osteogenesis imperfecta type V: Clinical and radiographic manifestations in mutation confirmed patients. *Am. J. Med. Genet. Part A* **2013**, *161*, 1972–1979. <https://doi.org/10.1002/ajmg.a.36024>.
47. Zhang, Z.; Li, M.; He, J.-W.; Fu, W.-Z.; Zhang, C.-Q.; Zhang, Z.-L. Phenotype and Genotype Analysis of Chinese Patients with Osteogenesis Imperfecta Type V. *PLoS ONE* **2013**, *8*, e72337. <https://doi.org/10.1371/journal.pone.0072337>.
48. Guillén-Navarro, E.; Ballesta-Martínez, M.J.; Valencia, M.; Bueno, A.M.; Martínez-Glez, V.; López-González, V.; Burnyte, B.; Utkus, A.; Lapunzina, P.; Ruiz-Perez, V.L. Two mutations in IFITM5 causing distinct forms of osteogenesis imperfecta. *Am. J. Med. Genet. Part A* **2014**, *164*, 1136–1142. <https://doi.org/10.1002/ajmg.a.36409>.
49. Rauch, F.; Lalic, L.; Glorieux, F.H.; Moffatt, P.; Roughley, P. Targeted Sequencing of a Pediatric Metabolic Bone Gene Panel Using a Desktop Semiconductor Next-Generation Sequencer. *Calcif. Tissue Res.* **2014**, *95*, 323–331. <https://doi.org/10.1007/s00223-014-9897-9>.
50. Lazarus, S.; McInerney-Leo, A.M.; McKenzie, F.A.; Baynam, G.; Broley, S.; Cavan, B.; Munns, C.F.; Pruijs, J.E.; Sillence, D.; Terhal, P.A.; et al. The IFITM5 mutation c.-14C> T results in an elongated transcript expressed in human bone; and causes varying phenotypic severity of osteogenesis imperfecta type V. *BMC Musculoskelet Disord.* **2014**, *15*, 107. <https://doi.org/10.1186/1471-2474-15-107>. PMID: 24674092; PMCID: PMC3986707.
